# Supplementary material for: Growth in achondroplasia including stature, weight, weight-for-height and head circumference from CLARITY: achondroplasia natural history study—a multi-center retrospective cohort study of achondroplasia in the US
Source: Orphanet J Rare Dis. 2021 Dec 23;16:522. doi: 10.1186/s13023-021-02141-4 (PMC8697459; doi:10.1186/s13023-021-02141-4)
Supplement: Supplementary file 3 — Additional file 3: Table S2. Male and female weight-for-height mean and SD by centimeter from 50–140 cm in males and 50–134 cm in females. [file 13023_2021_2141_MOESM3_ESM.csv]

Sex (M=0, F = 1)	ht (cm)	htinterval (cm)	n	wt mean	wt sd lower	wt sd upper
0	50	[50,51)	131	3.779756961	0.638490235	0.595183883
0	51	[51,52)	187	4.063850459	0.643310898	0.70490158
0	52	[52,53)	249	4.339199294	0.650316253	0.792273072
0	53	[53,54)	226	4.607485762	0.659368465	0.859746494
0	54	[54,55)	244	4.870392154	0.670329702	0.909769977
0	55	[55,56)	243	5.129600765	0.683062131	0.944791654
0	56	[56,57)	251	5.386793888	0.69742792	0.967259658
0	57	[57,58)	273	5.643653816	0.713289237	0.979622121
0	58	[58,59)	282	5.901862842	0.730508248	0.984327175
0	59	[59,60)	317	6.163103261	0.74894712	0.983822955
0	60	[60,61)	331	6.429057364	0.768468022	0.980557592
0	61	[61,62)	348	6.701407445	0.788933119	0.976979219
0	62	[62,63)	381	6.981835798	0.810204581	0.975535968
0	63	[63,64)	388	7.272020652	0.832144811	0.978671363
0	64	[64,65)	386	7.572851966	0.854662199	0.987935051
0	65	[65,66)	402	7.883495789	0.877765709	1.002921804
0	66	[66,67)	384	8.202890213	0.901477601	1.022967898
0	67	[67,68)	398	8.529973329	0.925820134	1.04740961
0	68	[68,69)	425	8.863683229	0.950815571	1.075583214
0	69	[69,70)	407	9.202958005	0.97648617	1.106824987
0	70	[70,71)	443	9.546735749	1.002854193	1.140471205
0	71	[71,72)	447	9.893954553	1.029941901	1.175858145
0	72	[72,73)	463	10.24355251	1.057771554	1.212322081
0	73	[73,74)	474	10.59446771	1.086365411	1.24919929
0	74	[74,75)	458	10.94563824	1.115745735	1.285826049
0	75	[75,76)	478	11.29600221	1.145934786	1.321538632
0	76	[76,77)	457	11.64450794	1.176952941	1.355683613
0	77	[77,78)	481	11.99076052	1.208699902	1.388267602
0	78	[78,79)	473	12.33540796	1.240883742	1.420345323
0	79	[79,80)	464	12.67919094	1.2731955	1.453064655
0	80	[80,81)	473	13.02285014	1.305326217	1.487573477
0	81	[81,82)	454	13.36712625	1.336966934	1.525019668
0	82	[82,83)	466	13.71275996	1.367808692	1.566551105
0	83	[83,84)	437	14.06049195	1.39754253	1.613315668
0	84	[84,85)	443	14.41106291	1.425859489	1.666461234
0	85	[85,86)	405	14.76521352	1.45245061	1.727135684
0	86	[86,87)	395	15.12368448	1.477006933	1.796486894
0	87	[87,88)	390	15.48721645	1.499219499	1.875662745
0	88	[88,89)	339	15.85655015	1.518779348	1.965811114
0	89	[89,90)	335	16.23245255	1.535420399	2.068098272
0	90	[90,91)	289	16.61650162	1.550197966	2.184257314
0	91	[91,92)	269	17.01122029	1.565707132	2.316681826
0	92	[92,93)	276	17.41918481	1.584629858	2.467802662
0	93	[93,94)	265	17.84297142	1.609648103	2.640050675
0	94	[94,95)	263	18.28515637	1.643443826	2.835856719
0	95	[95,96)	253	18.7483159	1.688698985	3.057651648
0	96	[96,97)	237	19.23502627	1.748095541	3.307866313
0	97	[97,98)	218	19.74786372	1.824315453	3.58893157
0	98	[98,99)	228	20.2894045	1.920040678	3.90327827
0	99	[99,100)	215	20.86222484	2.037953178	4.253337268
0	100	[100,101)	213	21.46890101	2.180734911	4.641539417
0	101	[101,102)	219	22.11200924	2.351067835	5.070315569
0	102	[102,103)	213	22.79405028	2.551447705	5.541802261
0	103	[103,104)	223	23.51618649	2.781069921	6.052919466
0	104	[104,105)	210	24.2784317	3.036297601	6.596110431
0	105	[105,106)	227	25.08076246	3.313401958	7.163673138
0	106	[106,107)	208	25.92315532	3.608654206	7.74790557
0	107	[107,108)	194	26.80558684	3.918325556	8.341105709
0	108	[108,109)	217	27.72803357	4.238687223	8.935571536
0	109	[109,110)	186	28.69047206	4.566010419	9.523601034
0	110	[110,111)	187	29.69287887	4.896566359	10.09749218
0	111	[111,112)	169	30.73523054	5.226626253	10.64954297
0	112	[112,113)	144	31.81750364	5.552461317	11.17205137
0	113	[113,114)	159	32.9396747	5.870342763	11.65731537
0	114	[114,115)	165	34.10172029	6.176541804	12.09763295
0	115	[115,116)	185	35.30320031	6.467584961	12.48591832
0	116	[116,117)	174	36.53898676	6.742871331	12.82201903
0	117	[117,118)	163	37.80099949	7.003608986	13.11014884
0	118	[118,119)	157	39.08111229	7.251034212	13.35458964
0	119	[119,120)	137	40.37119896	7.486383299	13.55962329
0	120	[120,121)	132	41.6631333	7.710892537	13.72953168
0	121	[121,122)	123	42.9487891	7.925798213	13.86859666
0	122	[122,123)	111	44.22004015	8.132336618	13.98110013
0	123	[123,124)	125	45.46876025	8.331744041	14.07132395
0	124	[124,125)	138	46.6868232	8.52525677	14.14355
0	125	[125,126)	145	47.8661028	8.714111094	14.20206016
0	126	[126,127)	168	48.99847283	8.899543303	14.25113629
0	127	[127,128)	151	50.0758071	9.082789685	14.29506027
0	128	[128,129)	163	51.0909292	9.26425409	14.33632786
0	129	[129,130)	151	52.04384573	9.438045031	14.36392724
0	130	[130,131)	119	52.93784769	9.595392453	14.36067021
0	131	[131,132)	131	53.77624303	9.727511457	14.30933671
0	132	[132,133)	99	54.56233971	9.825617143	14.1927067
0	133	[133,134)	104	55.29944569	9.880924612	13.99356012
0	134	[134,135)	100	55.99086891	9.884648965	13.69467691
0	135	[135,136)	83	56.63991733	9.828005302	13.27883703
0	136	[136,137)	79	57.2498989	9.702208723	12.72882041
0	137	[137,138)	63	57.82412158	9.49847433	12.02740701
0	138	[138,139)	60	58.36589332	9.208017222	11.15737677
0	139	[139,140)	42	58.87852207	8.8220525	10.10150964
0	140	[140,141)	27	59.36531579	8.331795266	8.842585561
1	50	[50,51)	127	3.925006897	0.616918572	0.616918572
1	51	[51,52)	187	4.125482817	0.62696215	0.62696215
1	52	[52,53)	241	4.339358619	0.638188359	0.638188359
1	53	[53,54)	208	4.565615801	0.650465382	0.650465382
1	54	[54,55)	231	4.803235859	0.663661401	0.663661401
1	55	[55,56)	220	5.051200292	0.677644602	0.677644602
1	56	[56,57)	239	5.308490597	0.692283167	0.692283167
1	57	[57,58)	249	5.574088271	0.707445281	0.707445281
1	58	[58,59)	271	5.846974813	0.722999126	0.722999126
1	59	[59,60)	325	6.126131719	0.738812886	0.738812886
1	60	[60,61)	323	6.410540487	0.754754745	0.754754745
1	61	[61,62)	358	6.699182615	0.770692887	0.770692887
1	62	[62,63)	347	6.991039601	0.786495494	0.786495494
1	63	[63,64)	319	7.285148838	0.802031505	0.802031505
1	64	[64,65)	327	7.581349266	0.817315935	0.817315935
1	65	[65,66)	324	7.880079504	0.832683272	0.832683272
1	66	[66,67)	337	8.181792628	0.848510251	0.848510251
1	67	[67,68)	355	8.486941713	0.865173602	0.865173602
1	68	[68,69)	382	8.795979836	0.88305006	0.88305006
1	69	[69,70)	349	9.109360073	0.902516355	0.902516355
1	70	[70,71)	369	9.427535498	0.923949222	0.923949222
1	71	[71,72)	346	9.750959188	0.947725391	0.947725391
1	72	[72,73)	357	10.08008422	0.974221597	0.974221597
1	73	[73,74)	410	10.41536367	1.003814572	1.003814572
1	74	[74,75)	383	10.75725061	1.036881048	1.036881048
1	75	[75,76)	414	11.10619754	1.073797757	1.073797757
1	76	[76,77)	404	11.46231302	1.114933609	1.114933609
1	77	[77,78)	394	11.82478111	1.160155936	1.160155936
1	78	[78,79)	396	12.19263214	1.208535596	1.208535596
1	79	[79,80)	391	12.56489644	1.259072655	1.259072655
1	80	[80,81)	413	12.94060433	1.310767178	1.310767178
1	81	[81,82)	398	13.31878613	1.362619232	1.362619232
1	82	[82,83)	415	13.69847218	1.413628884	1.413628884
1	83	[83,84)	390	14.07869279	1.462796199	1.462796199
1	84	[84,85)	364	14.45847829	1.509121244	1.509121244
1	85	[85,86)	355	14.83685901	1.551604086	1.551604086
1	86	[86,87)	333	15.21286527	1.58924479	1.58924479
1	87	[87,88)	356	15.58552741	1.621043423	1.621043423
1	88	[88,89)	315	15.95418364	1.646000051	1.646000051
1	89	[89,90)	317	16.32186435	1.66318878	1.66318878
1	90	[90,91)	298	16.69403656	1.673965396	1.673965396
1	91	[91,92)	293	17.07621046	1.682344447	1.682344447
1	92	[92,93)	293	17.47389622	1.692490487	1.692490487
1	93	[93,94)	266	17.89260402	1.708568071	1.708568071
1	94	[94,95)	259	18.33784403	1.734741752	1.734741752
1	95	[95,96)	231	18.81512642	1.775176085	1.775176085
1	96	[96,97)	234	19.32996137	1.834035625	1.834035625
1	97	[97,98)	230	19.88785906	1.915484925	1.915484925
1	98	[98,99)	227	20.49432967	2.023688539	2.023688539
1	99	[99,100)	225	21.15488335	2.162811023	2.162811023
1	100	[100,101)	211	21.87502173	2.337016931	2.337016931
1	101	[101,102)	209	22.65792744	2.550470816	2.550470816
1	102	[102,103)	201	23.50133781	2.807015127	2.807015127
1	103	[103,104)	188	24.4022094	3.104783251	3.104783251
1	104	[104,105)	182	25.35749878	3.437009194	3.437009194
1	105	[105,106)	186	26.36416252	3.79676798	3.79676798
1	106	[106,107)	191	27.41915717	4.177134637	4.177134637
1	107	[107,108)	182	28.5194393	4.571184189	4.571184189
1	108	[108,109)	212	29.66196547	4.971991663	4.971991663
1	109	[109,110)	189	30.84369225	5.372632085	5.372632085
1	110	[110,111)	190	32.0615762	5.76618048	5.76618048
1	111	[111,112)	197	33.31257388	6.145711875	6.145711875
1	112	[112,113)	177	34.59364187	6.504301294	6.504301294
1	113	[113,114)	191	35.90190091	6.835023765	6.835023765
1	114	[114,115)	191	37.23613473	7.130954312	7.130954312
1	115	[115,116)	221	38.59609361	7.386017086	7.386017086
1	116	[116,117)	212	39.98153976	7.603690114	7.603690114
1	117	[117,118)	215	41.39223542	7.793467855	7.793467855
1	118	[118,119)	247	42.82794282	7.964938628	7.964938628
1	119	[119,120)	226	44.28842417	8.127690751	8.127690751
1	120	[120,121)	240	45.7734417	8.291312542	8.291312542
1	121	[121,122)	221	47.28275765	8.465392319	8.465392319
1	122	[122,123)	181	48.81613424	8.659518399	8.659518399
1	123	[123,124)	168	50.37333368	8.883279102	8.883279102
1	124	[124,125)	151	51.95411822	9.146262745	9.146262745
1	125	[125,126)	140	53.55810708	9.458057645	9.458057645
1	126	[126,127)	181	55.1634285	9.828252122	9.828252122
1	127	[127,128)	153	56.70400435	10.26643449	10.26643449
1	128	[128,129)	150	58.10831522	10.77587638	10.77587638
1	129	[129,130)	139	59.30484172	11.31207935	11.31207935
1	130	[130,131)	63	60.22206444	11.80870189	11.80870189
1	131	[131,132)	54	60.78846397	12.19928988	12.19928988
1	132	[132,133)	15	60.93252092	12.41738915	12.41738915
1	133	[133,134)	9	60.58271589	12.39654558	12.39654558
1	134	[134,135)	9	59.66752947	12.07030502	12.07030502
1	135	[135,136)	7
1	136	[136,137)	7
1	137	[137,138)	4
1	138	[138,139)	2
1	139	[139,140)	1
1	140	[140,141)	0
